# Supplementary material
Source: PubMed Central journal article supplement (PMC5766421)

# Figure S1

(A)

Coat surface with antidig → Passivate surface with casein → Tether DNA to the surface → Flow in streptavidin coated beads → Flush out free beads & flow in Mfd and ATP

(B)

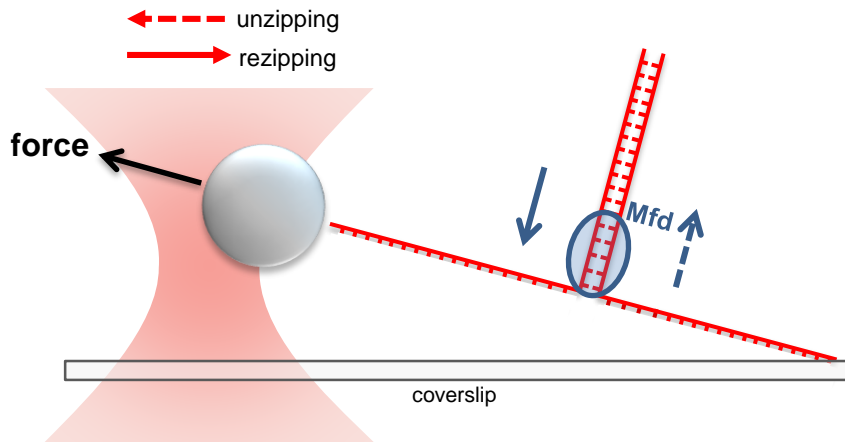

(C)

## Mfd's translocation on dsDNA in 2 mM ATP

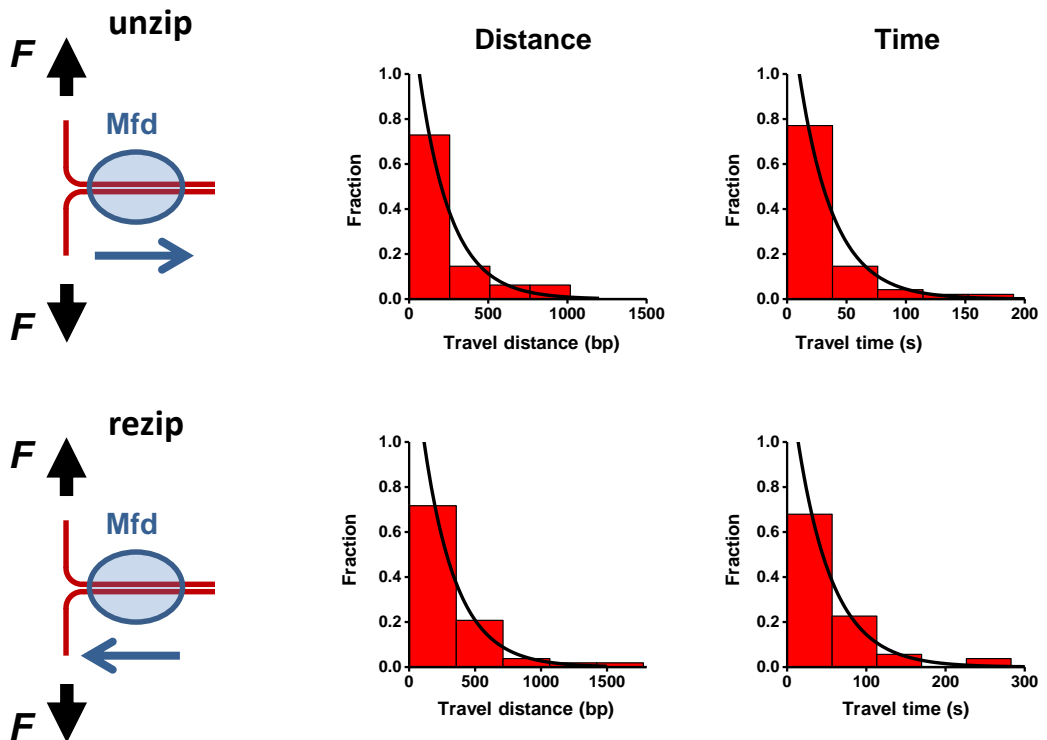

Supplement: NIHMS925383-supplement-1.pdf [file NIHMS925383-supplement-1.pdf]
