# Supplementary material
Source: PubMed Central journal article supplement (PMC5766421)

**Figure S2. Related to Figure 2.**

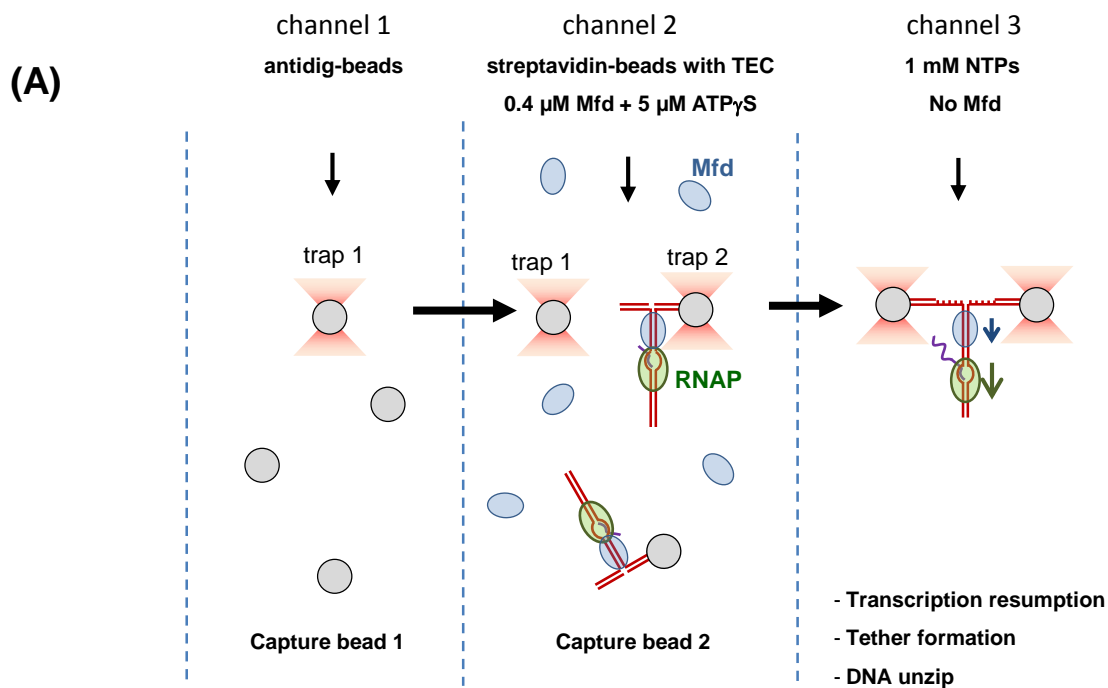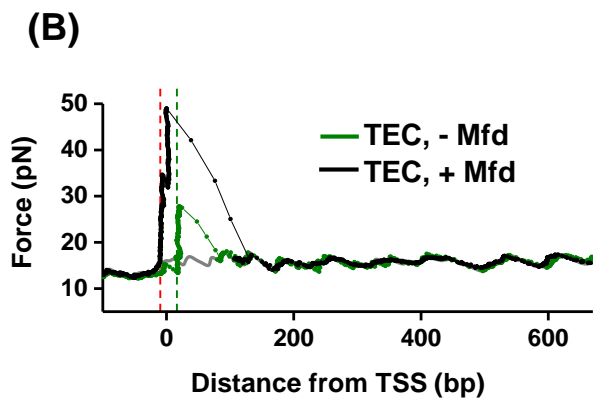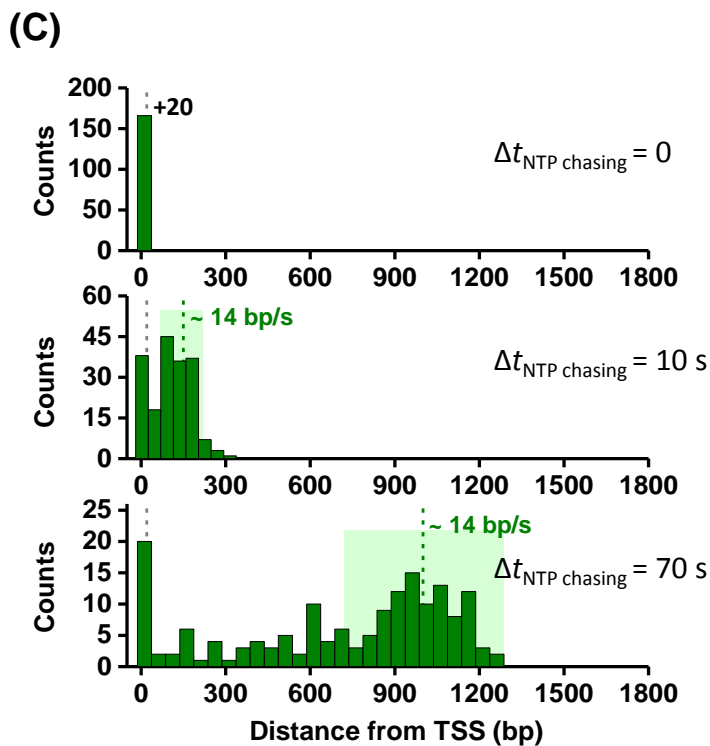

Supplement: NIHMS925383-supplement-2.pdf [file NIHMS925383-supplement-2.pdf]

**Figure S3. Related to Figures 2 and 3.**

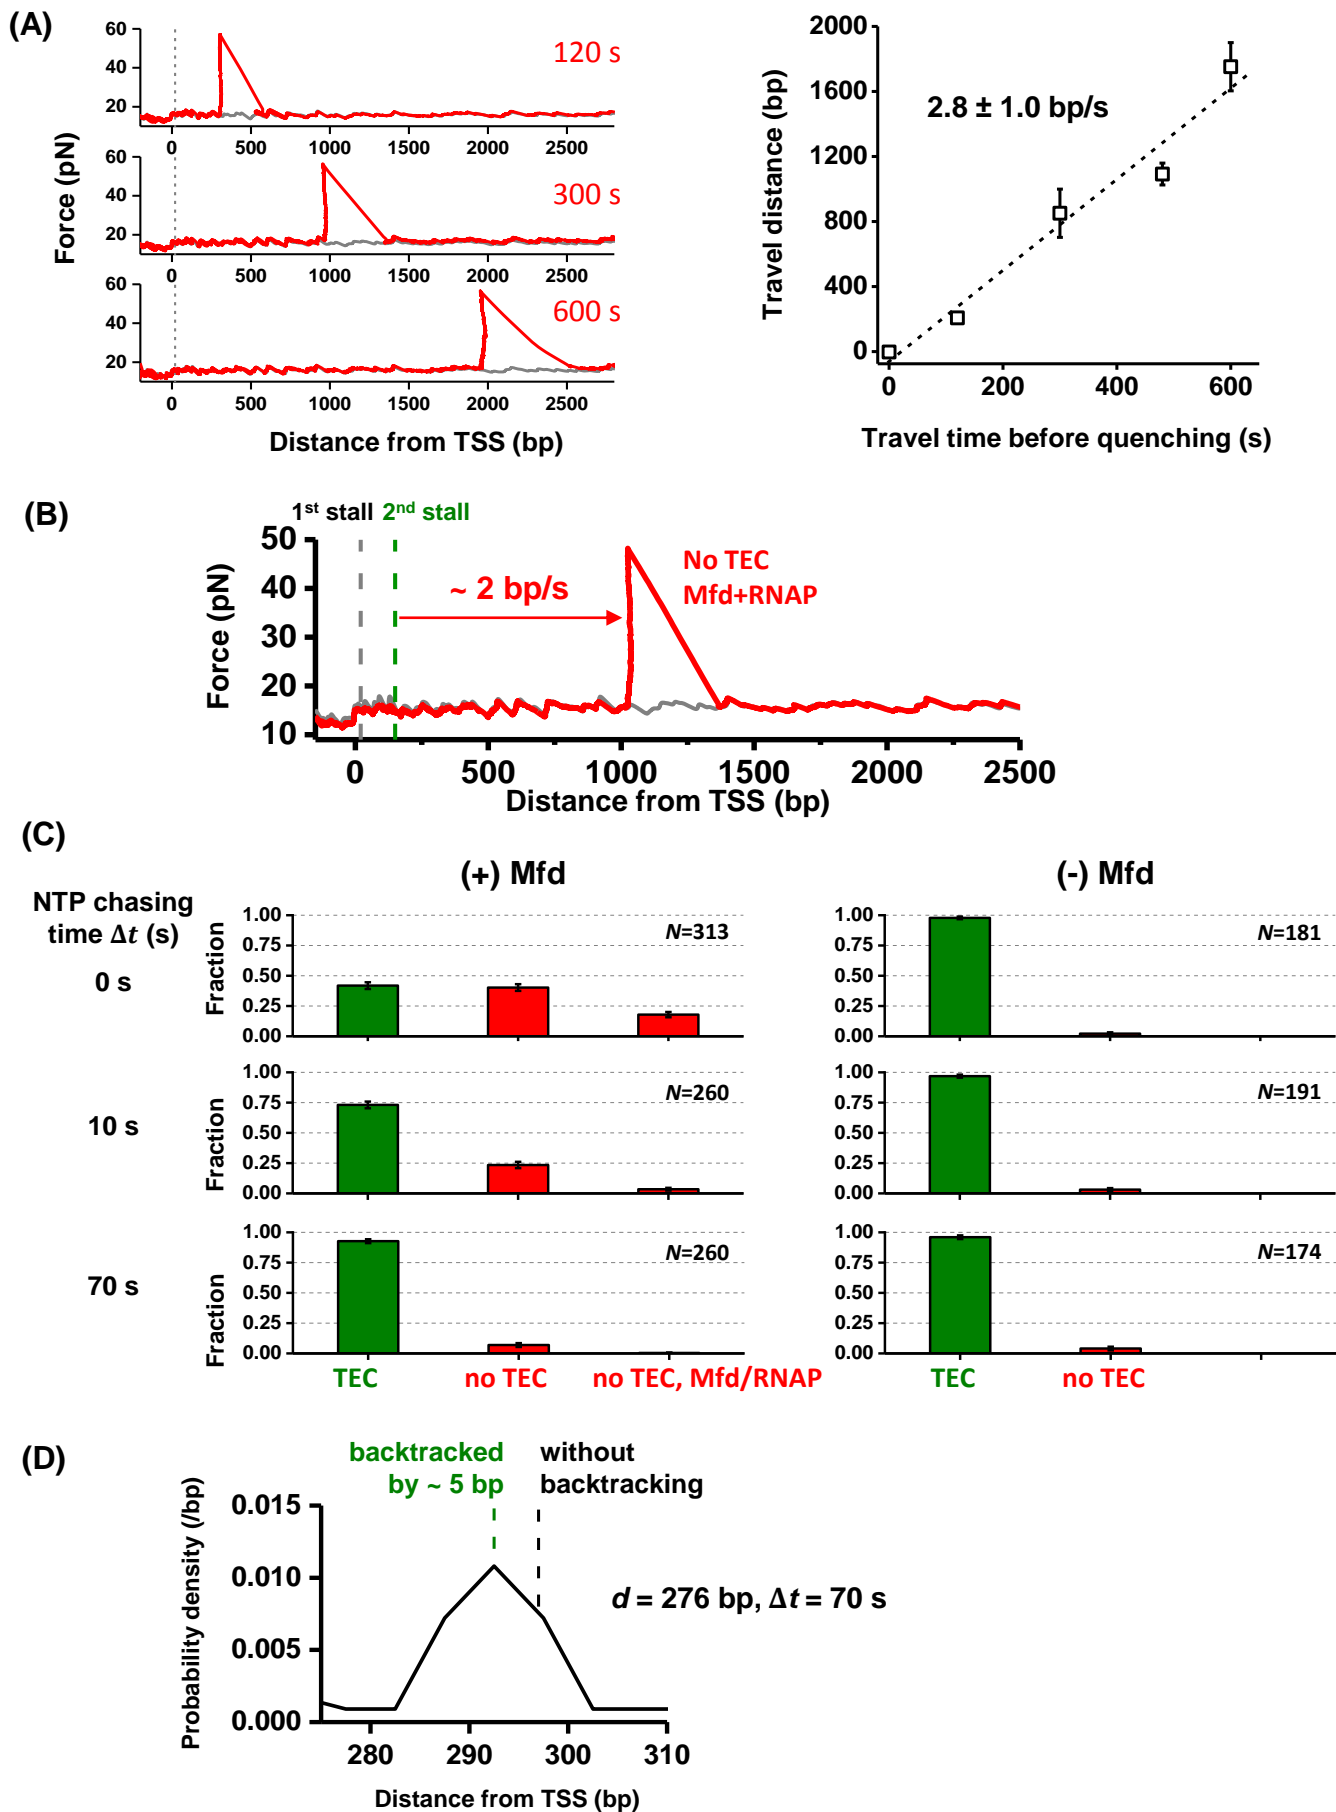

Supplement: NIHMS925383-supplement-3.pdf [file NIHMS925383-supplement-3.pdf]

Figure S4

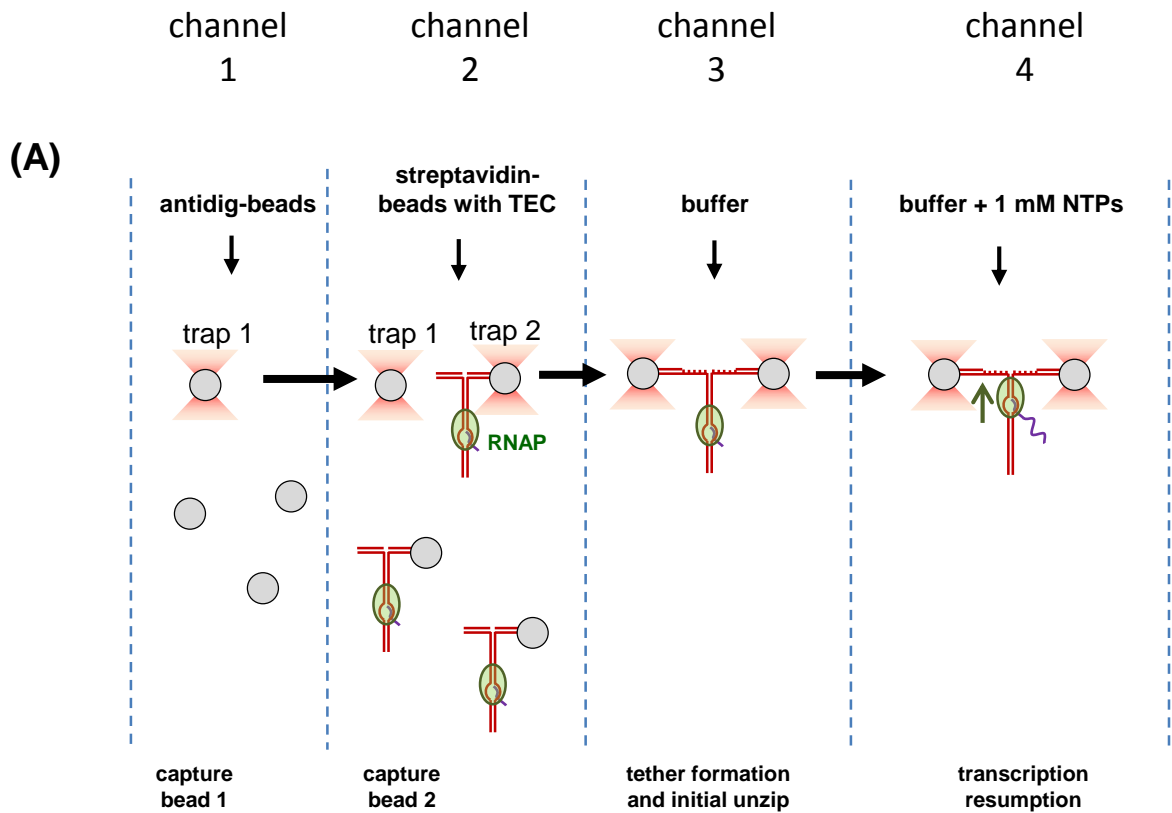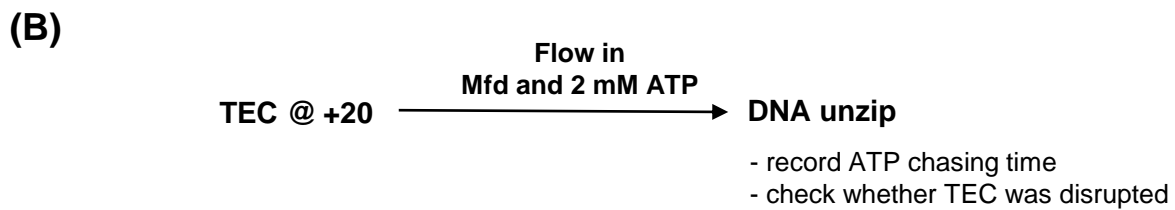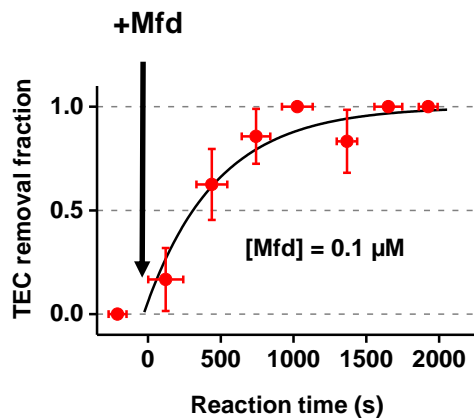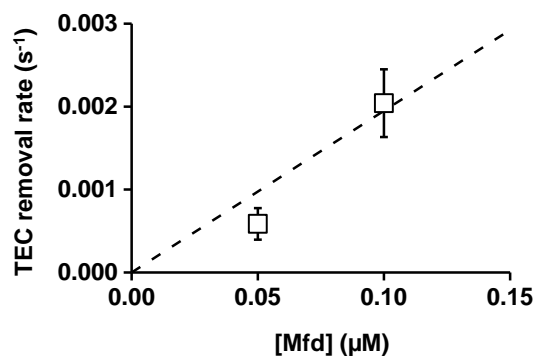

Supplement: NIHMS925383-supplement-4.pdf [file NIHMS925383-supplement-4.pdf]

Figure S5

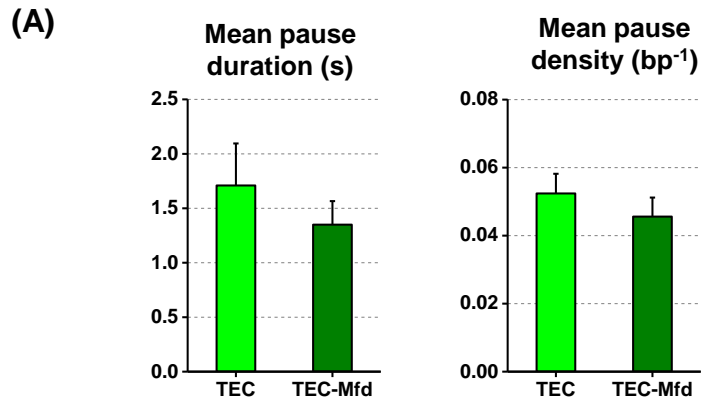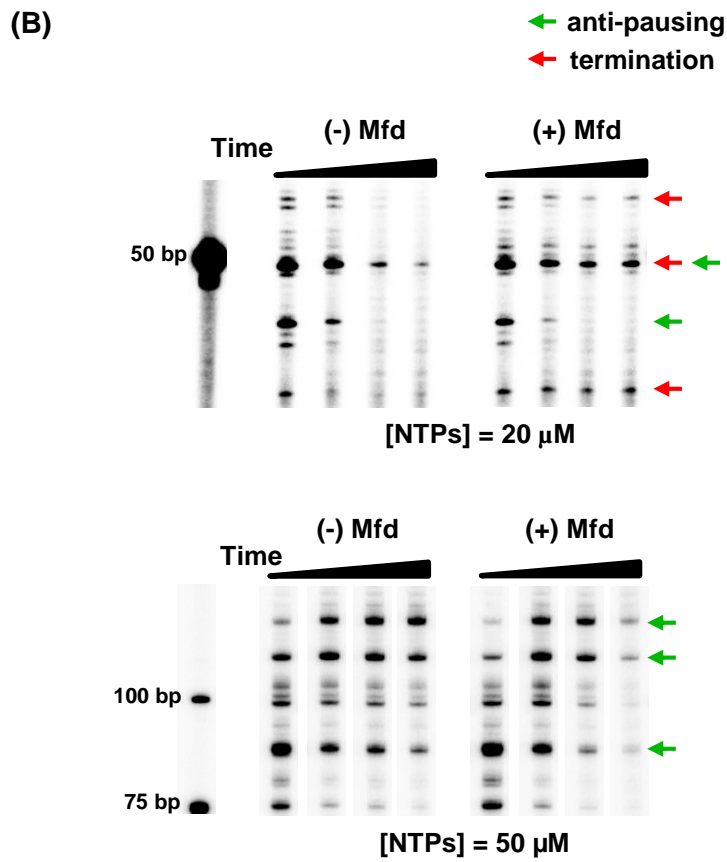

Supplement: NIHMS925383-supplement-5.pdf [file NIHMS925383-supplement-5.pdf]

Figure S6

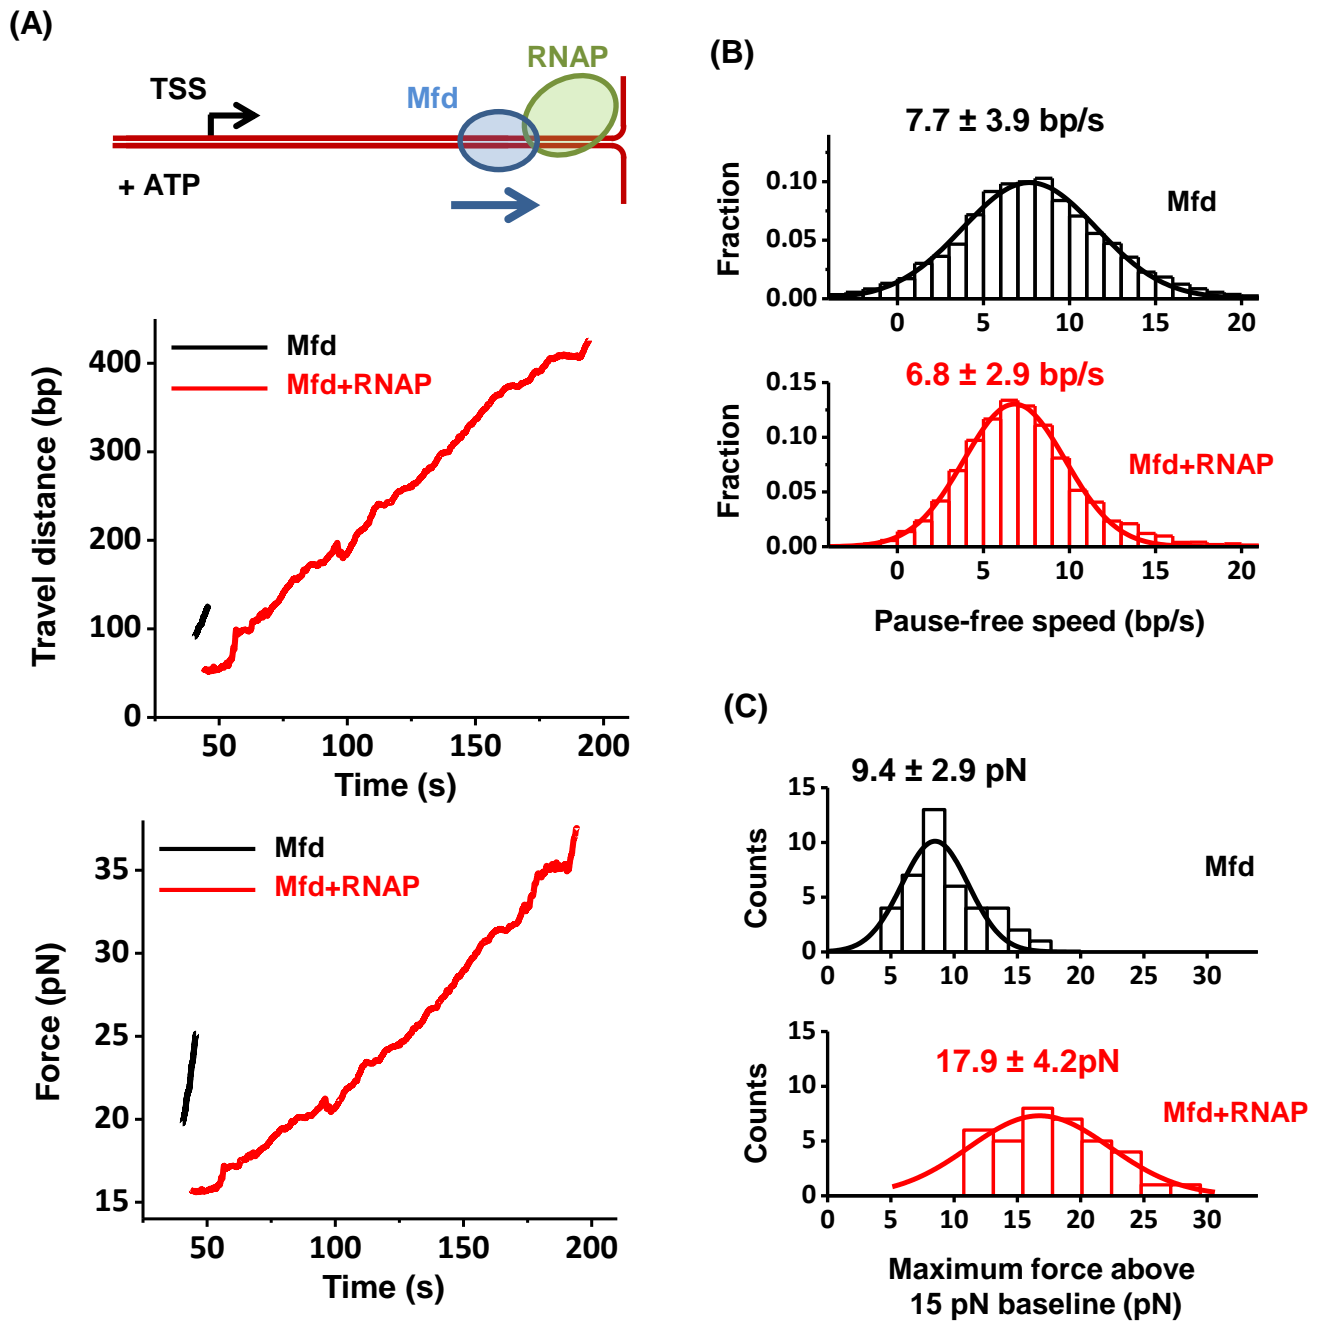

Supplement: NIHMS925383-supplement-6.pdf [file NIHMS925383-supplement-6.pdf]

Figure S7

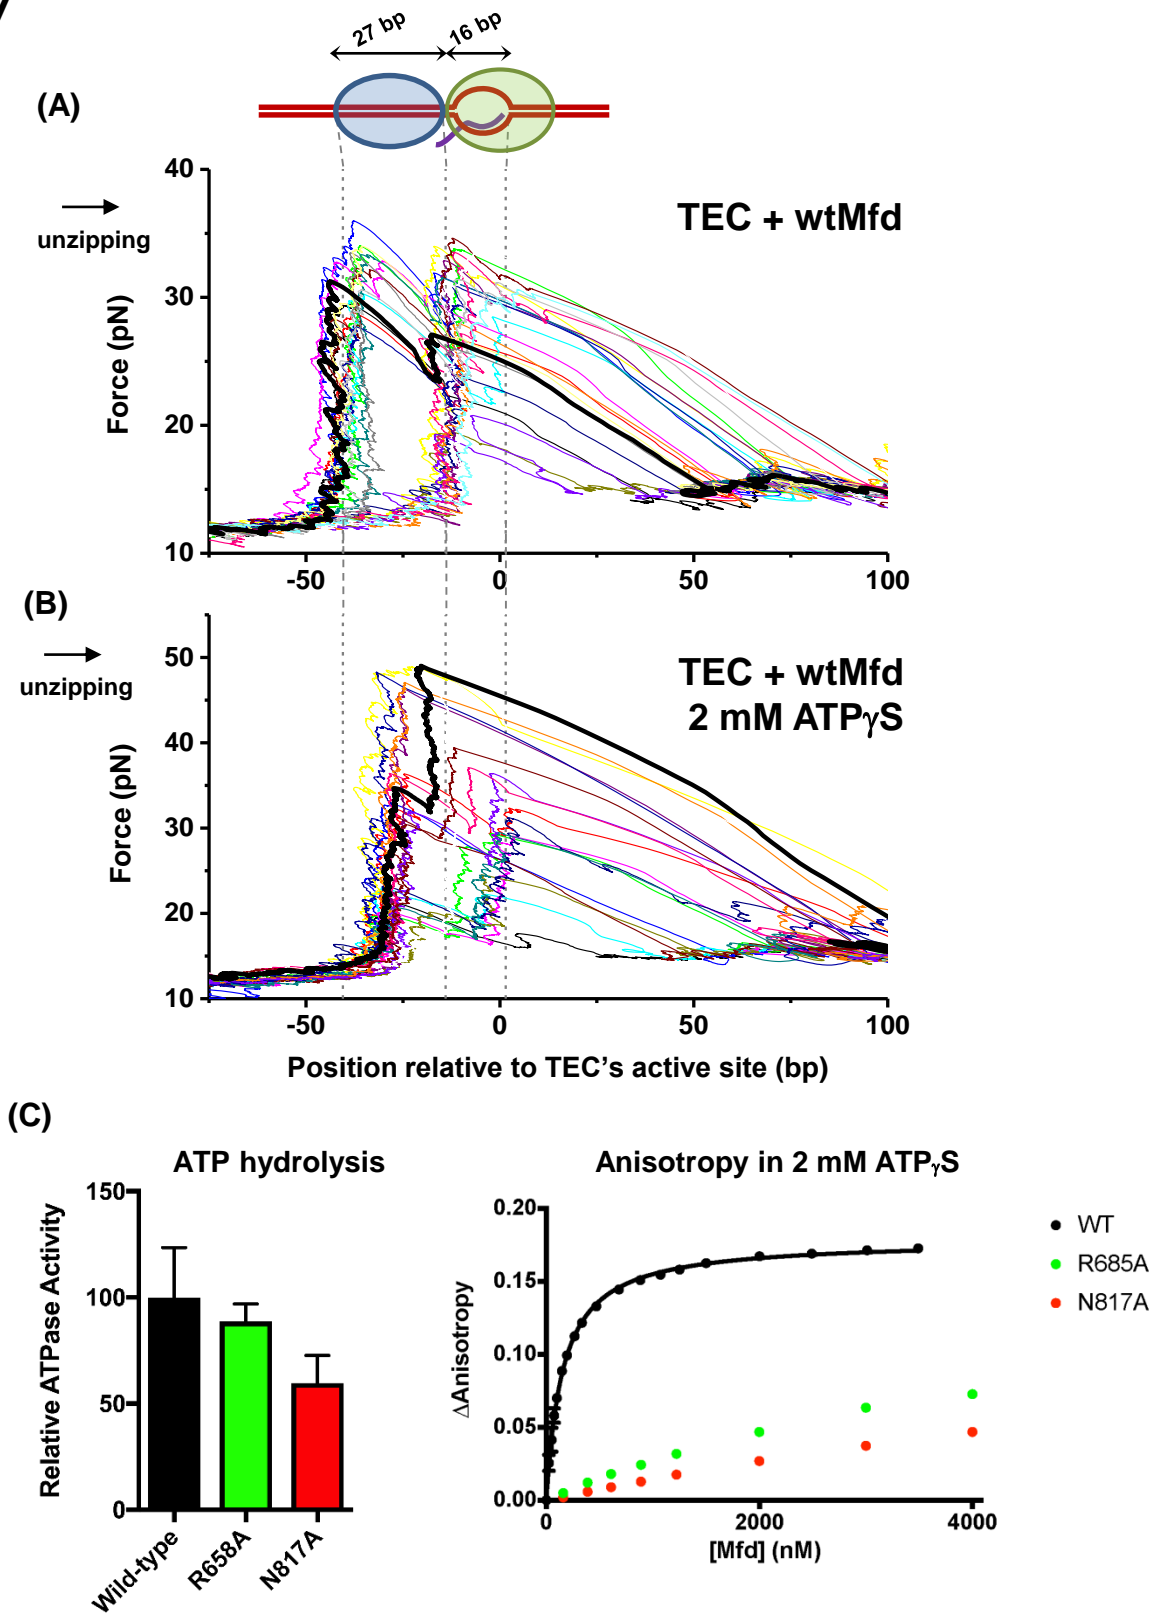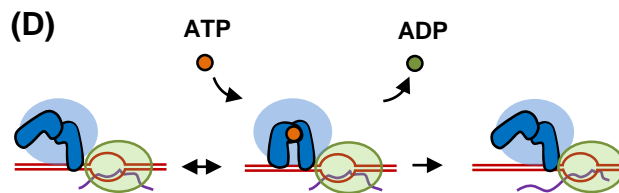

Supplement: NIHMS925383-supplement-7.pdf [file NIHMS925383-supplement-7.pdf]
